# Supplementary material
Source: publisher site journal article supplement (https://www.spandidos-publications.com/4136/downloadSupplementary)

Figure S1. Experimental flow chart. NRBP1, nuclear receptor binding protein 1; SALL4, spalt-like transcription factor 4.

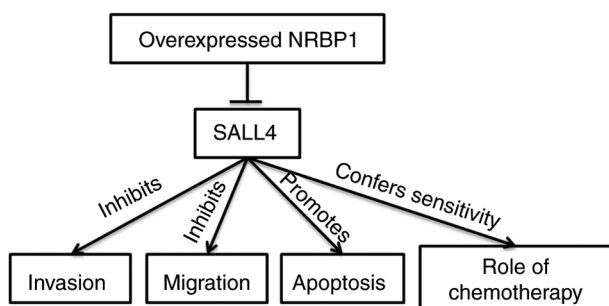

Supplement: Supplementary file 1 [file downloadSupplementary]
